# Supplementary material
Source: publisher site journal article supplement (https://www.kjim.org/upload/media/kjim-2025-038-Supplementary-Table-3.pdf)
Supplement: Supplementary file 1 [file kjim-2025-038-Supplementary-Table-3.pdf]

**Supplementary Table 3. Characteristics of participants by tertiles of the predicted pro-inflammatory hs-CRP score**

| Characteristic                          | All respondents<br>(n = 254) | IBD status                      |                        |
|-----------------------------------------|------------------------------|---------------------------------|------------------------|
|                                         |                              | IBD-free non-cases<br>(n = 127) | IBD cases<br>(n = 127) |
| Predicted pro-inflammatory hs-CRP score | -2.6 ± 0.6                   | -2.6 ± 0.5                      | -2.6 ± 0.6             |
| Crohn's disease                         | 59 (46.5)                    |                                 | 59 (46.5)              |
| Females                                 | 102 (40.2)                   | 51 (40.2)                       | 51 (40.2)              |
| Post-menopausal women                   | 33 (32.4)                    | 16 (31.4)                       | 17 (33.3)              |
| Age (yr)                                | 44.6 ± 14.1                  | 45.6 ± 13.1                     | 43.9 ± 15.0            |
| Highest education completed             |                              |                                 |                        |
| College graduate or above               | 134 (52.8)                   | 69 (54.3)                       | 65 (51.2)              |
| Current smoking                         | 56 (22.0)                    | 31 (24.4)                       | 25 (19.7)              |
| Alcohol use                             | 150 (59.1)                   | 89 (70.1)                       | 61 (48.0)              |
| Alcohol intake (g/day) <sup>a)</sup>    | 15.6 (0.0, 81.4)             | 40.5 (0.0, 109.2)               | 0.0 (0.0, 71.3)        |
| Physical activity (MET-hours/week)      | 14.0 (5.3, 28.8)             | 11.9 (5.3, 25.6)                | 15.8 (5.3, 33.0)       |
| ≥ 14 MET- hours/week                    | 130 (51.2)                   | 62 (48.8)                       | 68 (53.5)              |
| BMI (kg/m <sup>2</sup> )                | 25.3 ± 4.6                   | 24.2 ± 3.6                      | 26.4 ± 5.2             |
| BMI ≥ 25 kg/m <sup>2</sup>              | 119 (46.9)                   | 45 (35.4)                       | 74 (58.3)              |
| Dietary energy intakes (kcal)           | 2,108.6 ± 972.9              | 2,094.0 ± 1,048.3               | 2,123.2 ± 895.1        |
| Glycated hemoglobin (%)                 | 13.6 ± 1.7                   |                                 | 13.6 ± 1.7             |
| Diabetes                                | 21 (8.3)                     | 10 (7.9)                        | 11 (8.7)               |
| Hypertension                            | 48 (18.9)                    | 26 (20.5)                       | 22 (17.3)              |

Continuous variables are presented as mean ± standard deviation or median (interquartile range), and categorical variables are presented as number (%).

IBD, Inflammatory bowel disease; hs-CRP, high sensitivity C-reactive protein; BMI, body mass index; MET, metabolic equivalent of task.

<sup>a)</sup>Estimate was among alcohol users only.
